# Supplementary material
Source: PubMed Central journal article supplement (PMC9179181)
Supplement: NIHMS1802448-supplement-Supplementary_Figure_2.pdf [file NIHMS1802448-supplement-Supplementary_Figure_2.pdf]

Figure E2

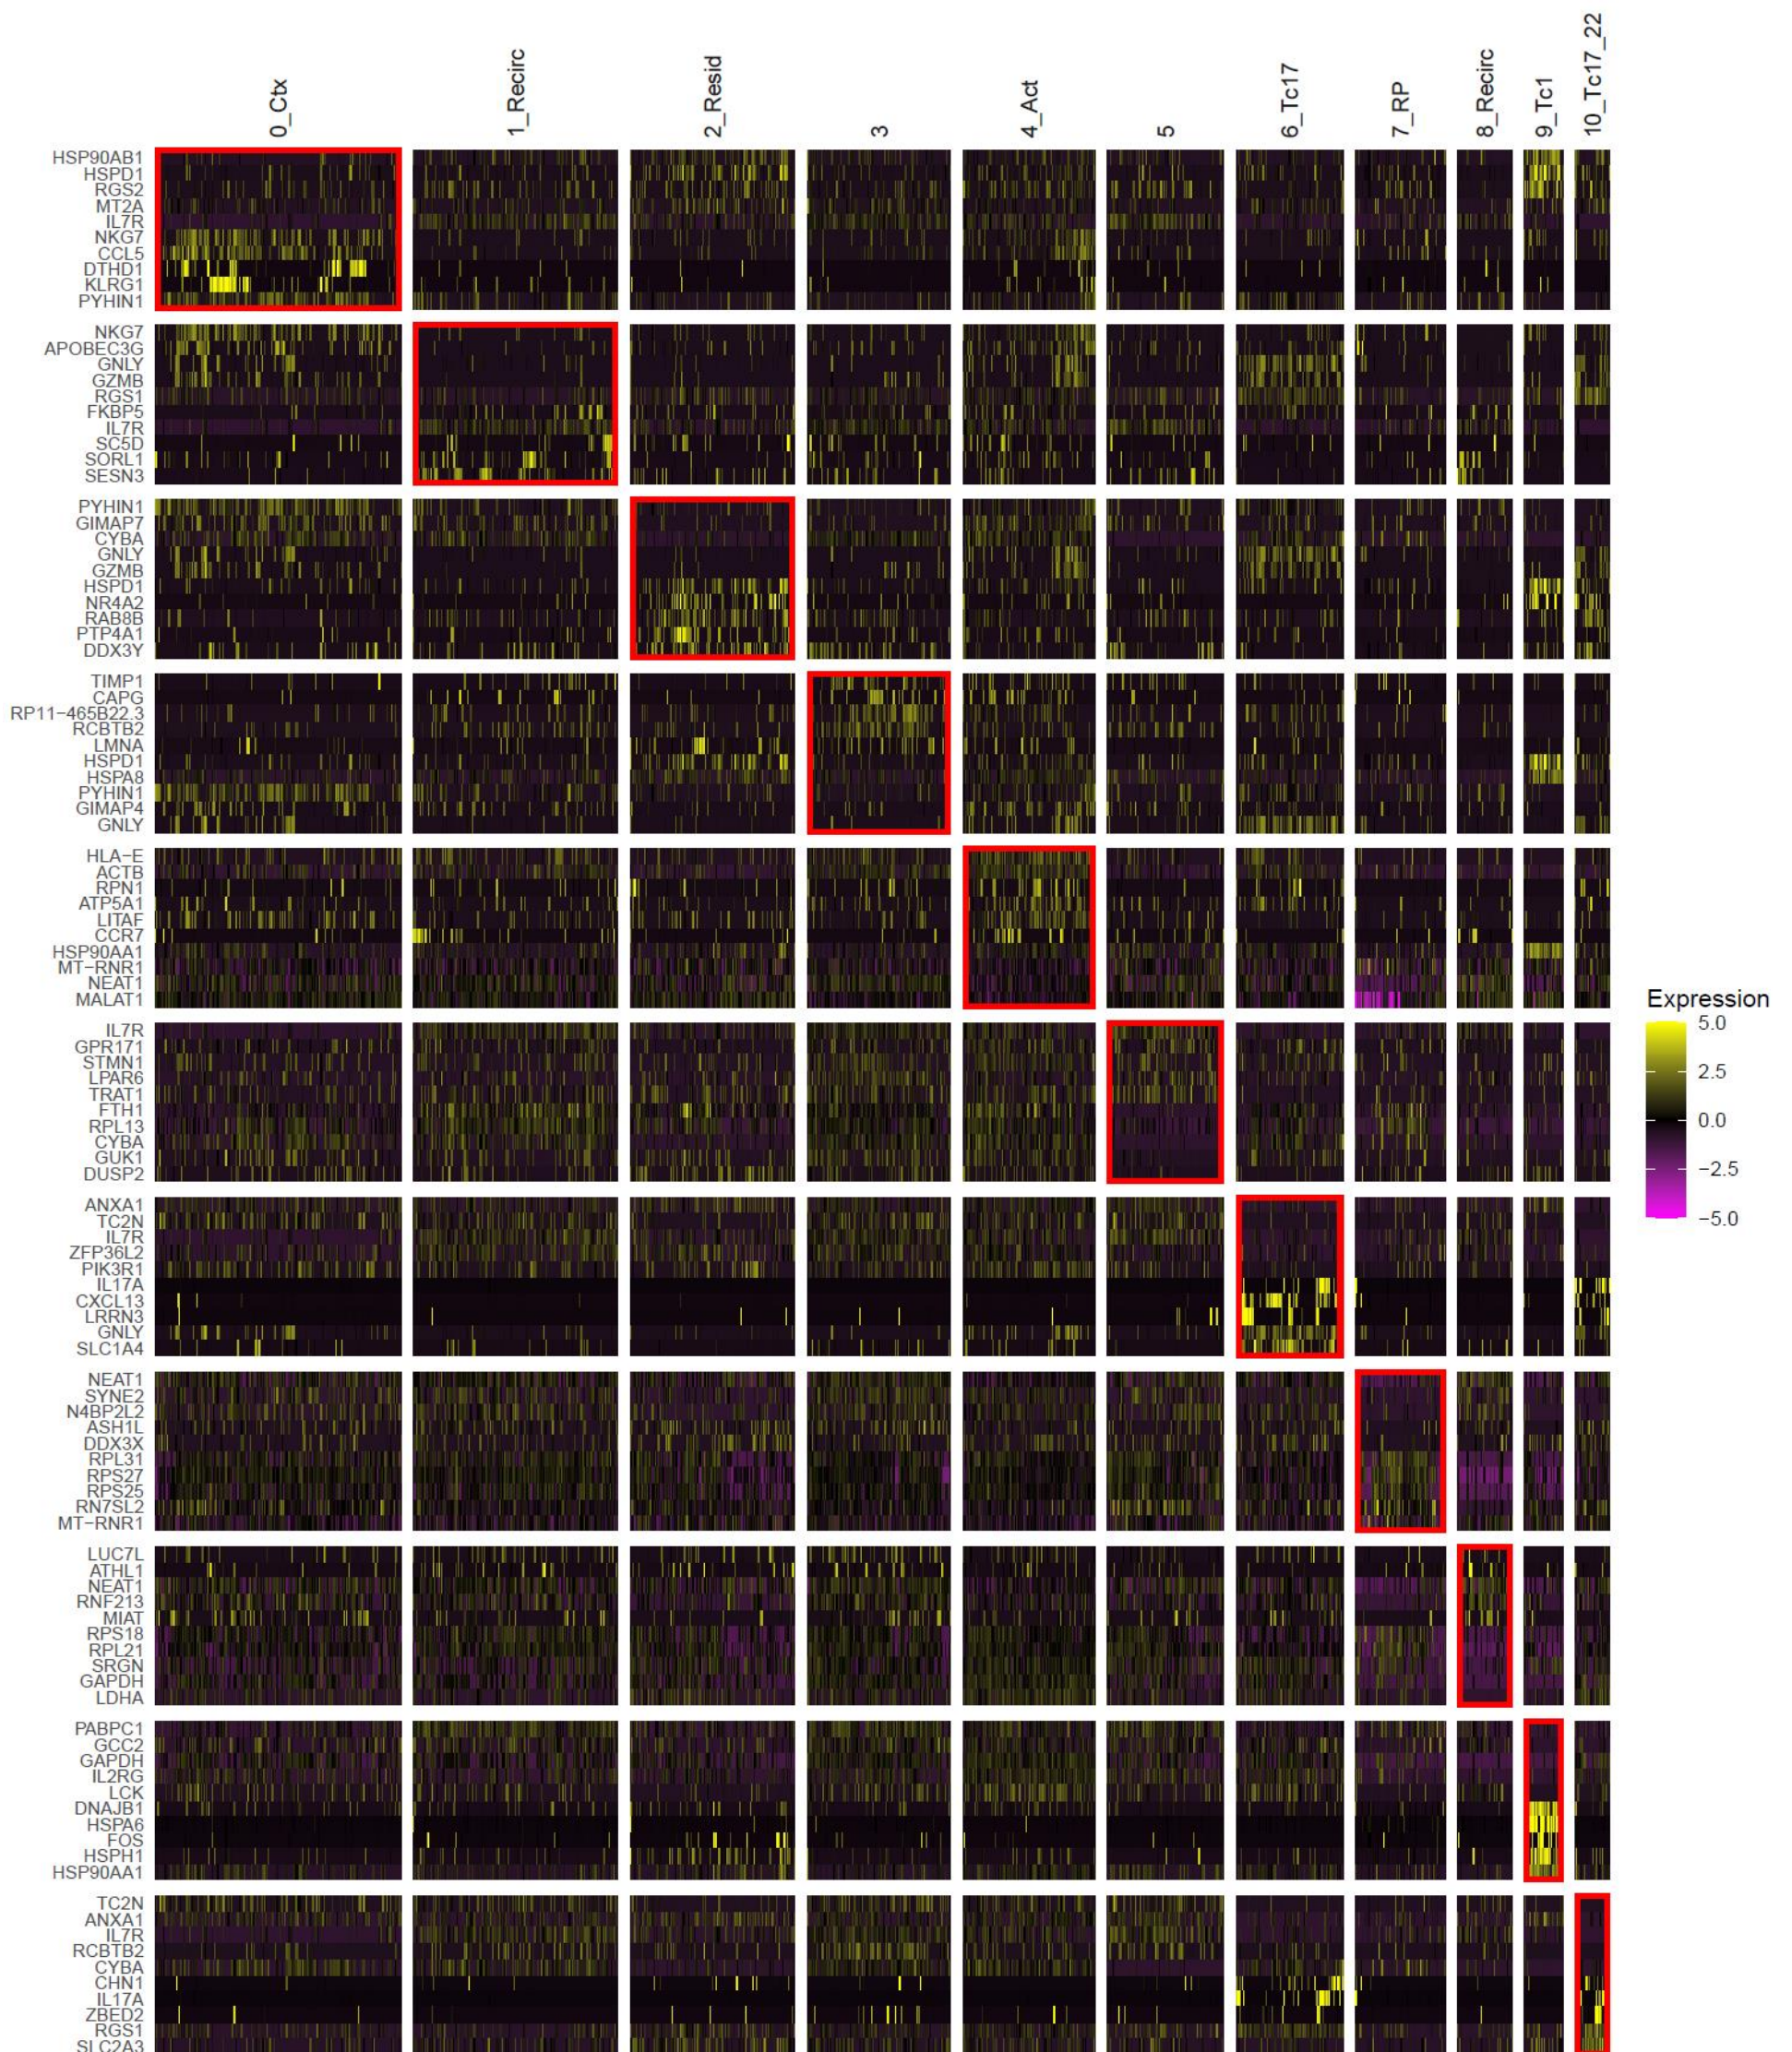

**Figure E2. Top 5 differentially upregulated and downregulated marker genes of each cluster.** Expression values within each gene are centered and scaled relative to the mean expression across all cells to obtain the z-scores plotted below. Z-scores exceeding 5 standard deviations away from the mean were accordingly set to +5.0 or -5.0. Red rectangles indicate the expression of marker genes (rows) within their corresponding cluster (columns). Complete lists of cluster markers can be found in Table E3.
