# Supplementary material
Source: PubMed Central journal article supplement (PMC9179181)
Supplement: NIHMS1802448-supplement-Supplementary_Figure_3.pdf [file NIHMS1802448-supplement-Supplementary_Figure_3.pdf]

Figure E3

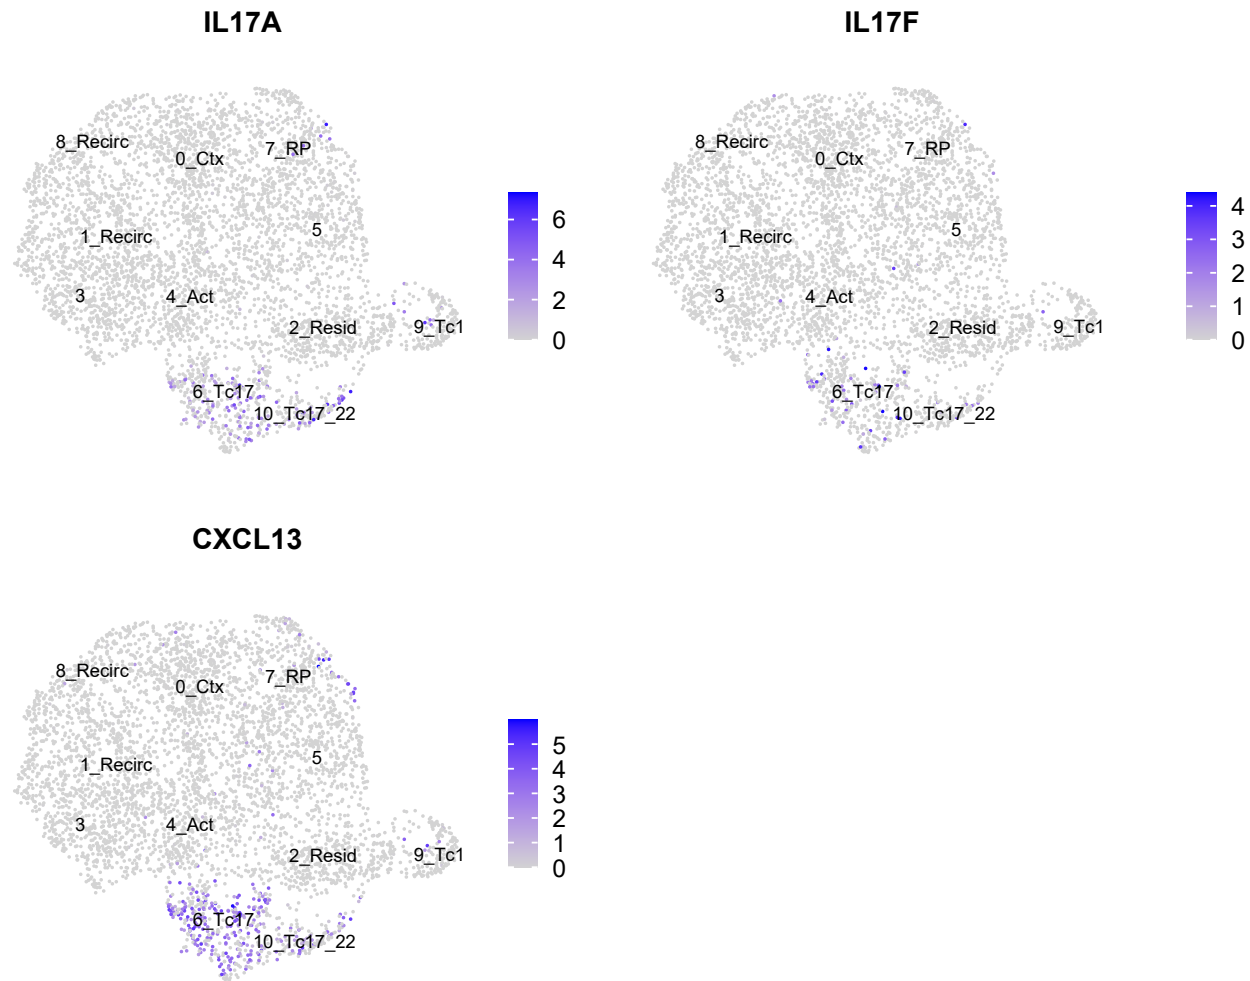

**Figure E3. Expression of IL17A and CXCL13 in a subset of Tc17 clusters.** Each panel shows the UMAP of CD8<sup>+</sup> T cells from Figure 1A. Color intensities indicate normalized expression.
