# Supplementary material
Source: PubMed Central journal article supplement (PMC9179181)
Supplement: NIHMS1802448-supplement-Supplementary_Figure_4.pdf [file NIHMS1802448-supplement-Supplementary_Figure_4.pdf]

Figure E4

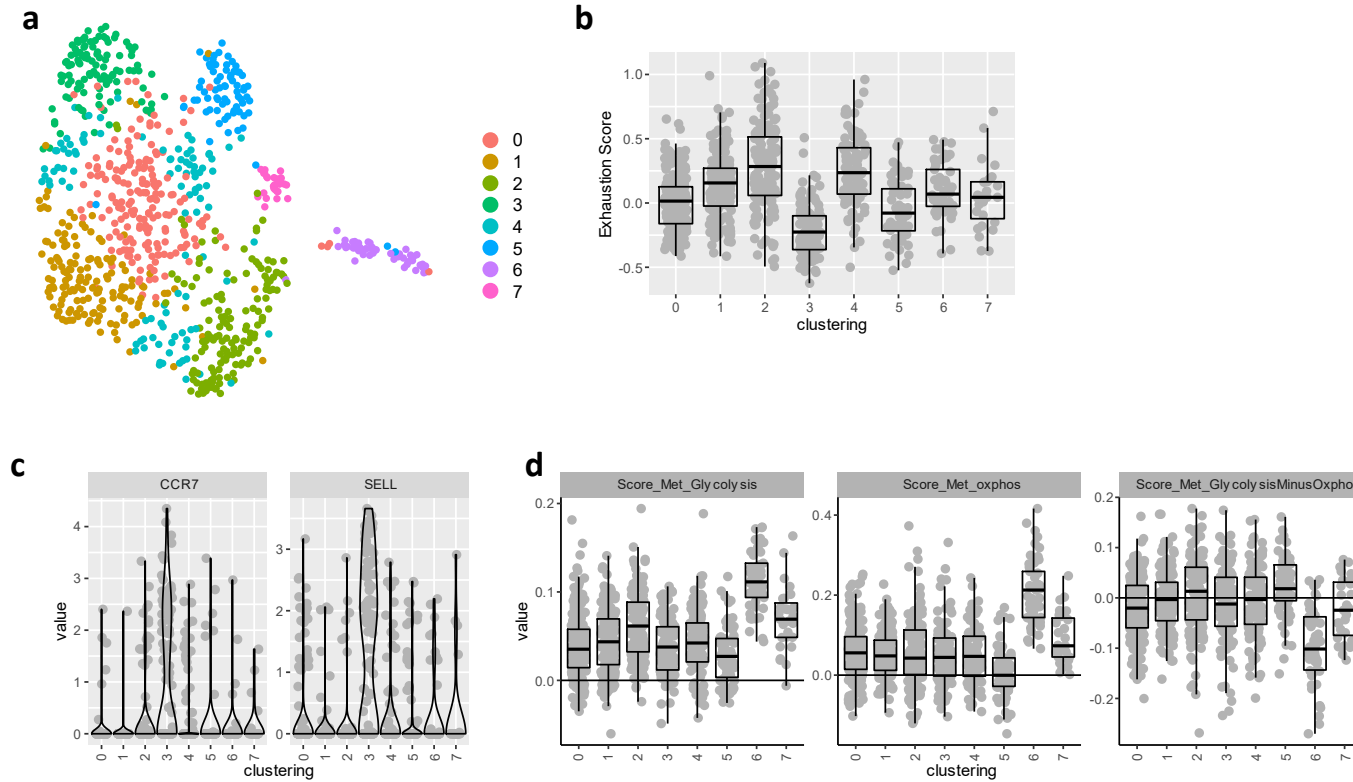

**Figure E4. Clustering and exhaustion scoring of melanoma-infiltrating CD8<sup>+</sup> T cells from Tirosh et al. 2016.** (a) UMAP of 841 melanoma-infiltrating CD8<sup>+</sup> T cells. (b) Exhaustion scores among clusters. Bars = median, hinges = quartile ranges, whiskers = 1.5 quartile ranges. (c) Recirculating marker gene expression and (d) metabolic scores among clusters.
