# Supplementary material
Source: PubMed Central journal article supplement (PMC9179181)
Supplement: NIHMS1802448-supplement-Supplementary_Figure_5.pdf [file NIHMS1802448-supplement-Supplementary_Figure_5.pdf]

Figure E5

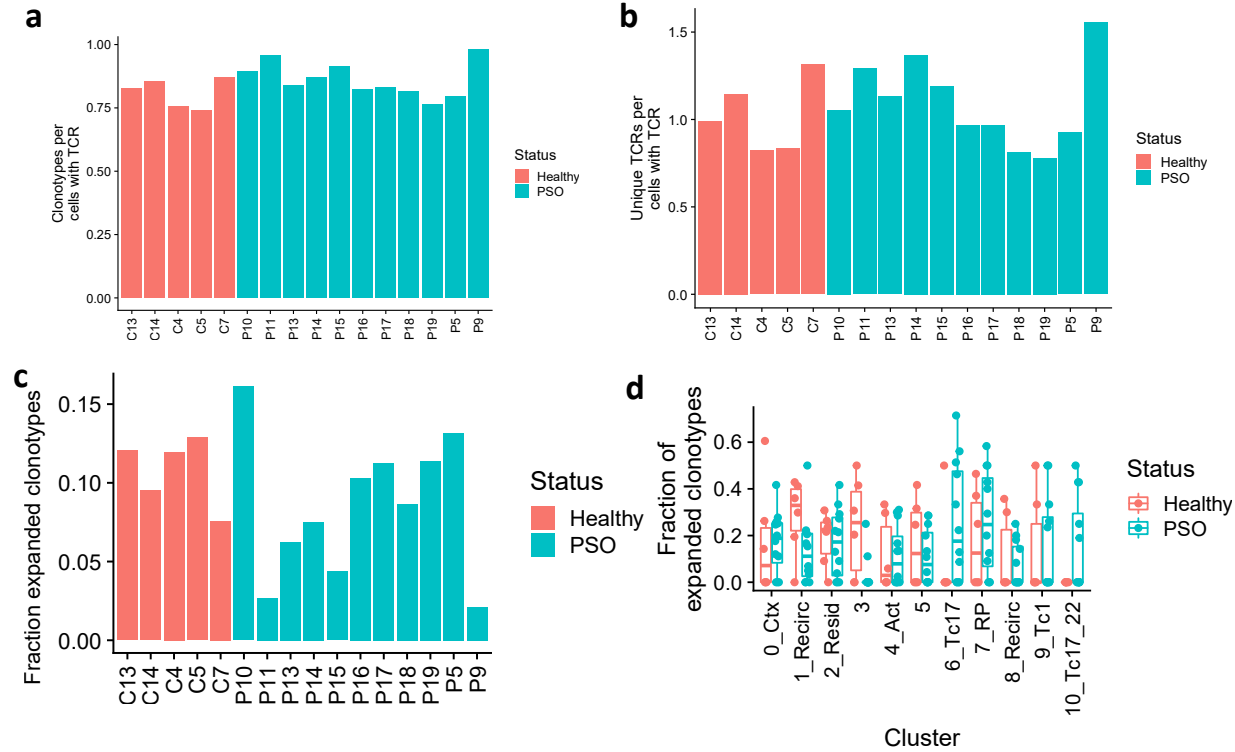

**Figure E5. Comparable degrees of clonotype expansion and TCR sharing among psoriasis and healthy subjects.** (a) Normalized clonotype diversity, (b) normalized TCR diversity, (c) and clonotype expansion among psoriasis and healthy subjects. (d) Clonotype expansion among clusters. Bars = median, hinges = quartile ranges, whiskers = 1.5 quartile ranges. PSO = psoriasis
