# Supplementary material
Source: PubMed Central journal article supplement (PMC9179181)
Supplement: NIHMS1802448-supplement-Supplementary_Figure_6.pdf [file NIHMS1802448-supplement-Supplementary_Figure_6.pdf]

Figure E6

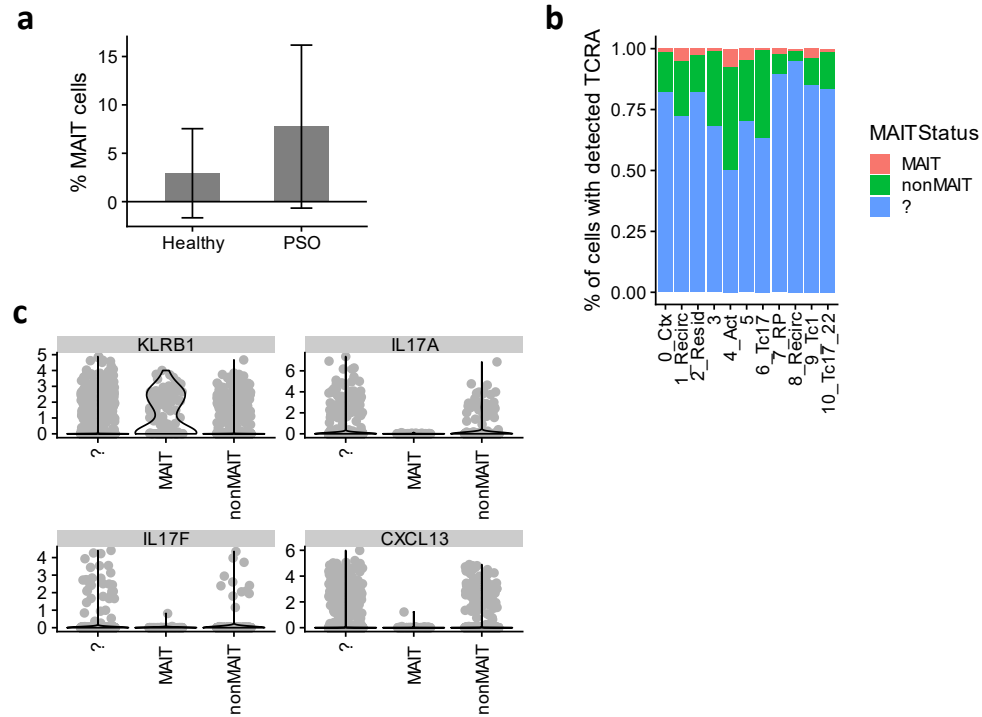

**Figure E6. MAIT cells in psoriatic and healthy skin.** (a) Average percentage of MAIT cells out of all cells in each healthy and psoriasis patient. Error bars =  $\pm$ SD. Differences are not significant (Wilcoxon  $p = 0.1708$ ). (b) Fraction of MAIT cells in each cluster. (c) Expression of Th17 genes and CXCL13 in MAIT cells. “MAIT” = cells with a detected MAIT TCRA, “nonMAIT” = cells with two detected non-MAIT TCRA, “?” = cells with no detected TCRA.
