# Supplementary material
Source: PubMed Central journal article supplement (PMC9179181)

Figure E1

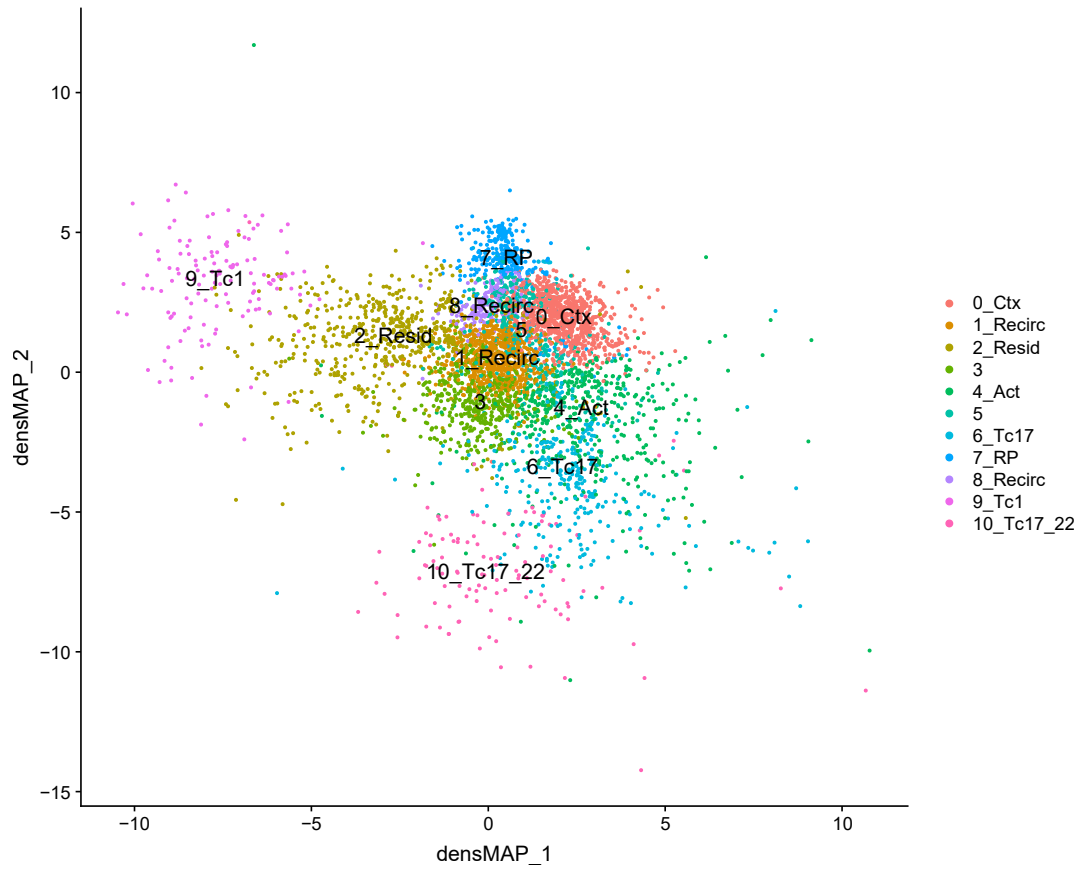

Figure E1. Density-preserving UMAP plot of CD8+ T cells from healthy and psoriatic skin.

Supplement: NIHMS1802448-supplement-Supplementary_Figure_1.pdf [file NIHMS1802448-supplement-Supplementary_Figure_1.pdf]
